## **Improving the quality of combined EEG-TMS neural recordings: Introducing the ‘Coil Spacer’.**

Ruddy, K.L.<sup>1</sup>, Woolley, D.G.<sup>1</sup>, Mantini, D.<sup>1,2</sup>, Balsters, J.H.<sup>1</sup>, Wenderoth, N.<sup>1\*</sup>

1. Neural Control of Movement Lab, ETH, Zurich, Switzerland.
2. Movement Control and Neuroplasticity Research Group, KU Leuven, Leuven, Belgium

Corresponding author address:

Neural Control of Movement Lab  
Department of Health Sciences and Technology  
ETH Zurich, Switzerland

Y36 M 12  
Winterthurerstrasse 190  
8057 Zürich

## **ABSTRACT (250 words)**

**Background:** In the last decade, interest in combined transcranial magnetic stimulation (TMS) and electroencephalography (EEG) approaches has grown substantially. Aside from the obvious artifacts induced by the magnetic pulses themselves, separate and more sinister signal disturbances arise as a result of contact between the TMS coil and EEG electrodes.

**New method:** Here we profile the characteristics of these artifacts and introduce a simple device – the coil spacer - to provide a platform allowing physical separation between the coil and electrodes during stimulation.

**Results:** EEG data revealed high amplitude signal disturbances when the TMS coil was in direct contact with the EEG electrodes, well within the physiological range of viable EEG signals. The largest artifacts were located in the Delta and Theta frequency range, and standard data cleanup using independent components analysis (ICA) was ineffective due to the artifact's similarity to real brain oscillations.

**Comparison with Existing Method:** While the current best practice is to use a large coil holding apparatus to fixate the coil 'hovering' over the head with an air gap, the spacer provides a simpler solution that ensures this distance is kept constant throughout testing.

**Conclusions:** The results strongly suggest that data collected from combined TMS-EEG studies with the coil in direct contact with the EEG cap are polluted with low frequency artifacts that are indiscernible from physiological brain signals. The coil spacer provides a cheap and simple solution to this problem and is recommended for use in future simultaneous TMS-EEG recordings.

Keywords: TMS; EEG; Signal processing;

## INTRODUCTION

There has been a recent surge in the number of publications reporting simultaneous transcranial magnetic stimulation (TMS) and electroencephalography (EEG) recordings. This amalgamation of methods has introduced valuable new ways to probe and measure the brain, such as with TMS evoked responses (eg. Ferreri et al. 2011, Miniussi and Thut 2010, Bonato et al. 2006) and TMS induced oscillations (eg. Paus et al. 2001). While the vast majority of studies have focused on post-TMS EEG signals, emerging theories on state-based stimulation make the claim that differences in ongoing neural oscillations at the moment when brain stimulation occurs likely impact outcome measures (see Thut and Pascual-Leone 2010). For these investigations, the EEG signal measured *before* the TMS pulse contains critical information.

Considering the immense methodological challenges posed by the application of high intensity magnetic pulses during the recording of delicate low amplitude EEG signals, it is not surprising that the focus of most attempts to improve combined TMS-EEG protocols has been on the substantial signal disturbances caused in the immediate interval following the pulse. In this regard, much progress has been made (Veniero et al. 2009), but there remains another less obvious source of artifact that has received little attention and is crucial to the study of pre-TMS brain states. This is the signal disturbance that arises simply from contact between the TMS apparatus and the surface of the EEG cap. In the absence of a dedicated investigation comparing signals with and without this disturbance, the extent of the artifact and its impact upon resulting interpretations of data remains unknown. Movement artifacts are in the frequency range of bioelectric events, making them particularly difficult to discern from true brain signals, posing a high risk of polluting the EEG in a way that is disguised as viable physiological data. Here we focus specifically on the artifact associated with direct contact between the TMS coil and electrodes during simultaneous EEG recording, and introduce a simple solution to improve the quality of such recordings for future investigations.

## **METHODS**

### *Participants*

Six healthy volunteers (age: 22-29, 4 male, 3 female) participated in the study. All gave informed consent to procedures. The experiments were approved by the Kantonale Ethikkommission Zürich, and were conducted in accordance with the Declaration of Helsinki (1964).

### *Experimental setup and procedure*

Subjects sat in a comfortable chair with both arms and legs resting in a neutral position supported by foam pillows. Surface electromyography (EMG, Trigno Wireless; Delsys) was recorded from right First Dorsal Interosseous (FDI) and Abductor Digiti Minimi (ADM). EMG data were sampled at 2000 Hz (National Instruments, Austin, Texas), amplified and stored on a PC for off-line analysis.

### *Combined TMS-EEG*

TMS was performed with a figure-of-eight coil (internal coil diameter 50 mm) connected to a Magstim 200 stimulator (Magstim, Whitland, UK). Prior to application of the EEG cap, the 'hotspot' of the right FDI was determined as the location with the largest and most consistent MEPs, and was marked directly onto the scalp with a skin marker. The TMS coil was held over this location with the optimal orientation for evoking a descending volley in the corticospinal tract (approximately 45 degrees from the sagittal plane in order to induce posterior-anterior current flow). Once the hotspot was established, the EEG cap (Electrical Geodesics Inc. (EGI), Oregon, USA) was applied and electrodes were filled with gel. Through the EEG cap, the previously marked position of the FDI hotspot was located visually and the TMS coil was applied directly over this point. With the coil directly resting on the EEG cap, the lowest stimulation intensity at which MEPs with a peak-to-peak amplitude of approximately 50  $\mu$ V were evoked in at least 5 of 10 consecutive trials was taken as Resting Motor Threshold (RMT). The procedure to establish RMT was repeated again with the introduction of the coil spacer between the cap and the TMS coil.

### *The Coil Spacer*

The coil spacer (Figure 1A & B) is a plastic circular tripod (1.1 cm in height) with a 12.5 cm handle, which was 3D printed (Ultimaker 2, design files available online at <https://3dprint.nih.gov/discover/3dpx-007789>) and can be customized to virtually every EEG cap and TMS coil available. The three conical feet attached to the circular ring are wider at the bottom than the top, to spread pressure widely over the scalp area and avoid discomfort. The circular ring is hollow in the middle to allow direct vision for positioning the centre of the ring on top of the marked hotspot. To ensure accurate placement of the coil over the hotspot, a red line is marked on the spacer handle, which should be aligned with the middle of the top rim of the TMS coil, in order to ensure that the centre of the coil (at the intersection of the two electromagnetic coils, where the magnetic pulse is strongest) is placed directly over the hotspot (which is positioned in the centre of the spacer ring).

EEG signals were recorded inside an electromagnetically shielded room, with a 64 channel gel-based TMS-compatible cap (MicroCel, EGI). The TMS machine was positioned outside the room, with the coil cable passed inside via a wave guide. Signals were amplified and sampled at 1000 Hz. The channel closest to the TMS hotspot was noted for later analyses. Impedances were monitored throughout and maintained below 50 k $\Omega$ .

There were two blocks of simultaneous TMS and EEG recording, each containing 20 magnetic pulses at an intensity of 120% RMT, with a 6-8 second inter-stimulus interval between pulses (jittered to avoid anticipation effects). In one block, TMS was applied while the coil was in direct contact with the EEG cap on the head, and in the other block the spacer was placed between the coil and the head in order to provide a platform over the electrodes, meaning that the coil could ‘hover’ over the cap without directly touching electrodes. Resting EEG data without TMS was also collected.

#### *EEG data processing, analysis and statistics*

As the focus of this investigation was upon the quality of EEG signals recorded while the TMS coil is placed on the head but *before* the TMS pulse was applied, the first step was to extract 4000 ms epochs of data in the interval immediately before the magnetic pulse. By epoching in this way, the large artifacts associated with the pulses

are excluded from any further analysis, and normal filtering procedures can be applied to the remaining data. Thus, our investigation focused on artifacts that are associated with direct contact between the TMS coil and the EEG electrodes.

After epoching, the same EEG data were analysed in two different ways using EEGLAB (Delorme and Makeig 2004). First, signals were analysed in their ‘raw’ state, with only minimal processing applied (a 1-80Hz bandpass filter, and average re-referencing). Then, separately the signals were processed and cleaned using a standard pipeline. Independent Components analysis was performed on the data, and bad components containing physiological artifacts were identified by correlations with signals recorded from electrooculographic (EOG) and facial EMG electrodes. The rejection of artifactual bad components using this method was automated and therefore not prone to subjective experimenter bias, and consistent across datasets. Bad channels were detected and interpolated. The purpose of this dual approach displaying raw and cleaned data was to demonstrate explicitly the profile of the TMS-EEG movement artifacts in their unaltered form, and subsequently demonstrate whether traditional processing approaches are capable of rendering the data useable.

Power spectral density was computed for both raw and cleaned signals for the data recorded from the electrode closest to the TMS hotspot, and for a ‘control’ electrode, which was selected as the corresponding location in the opposite hemisphere. This electrode was chosen as it could be expected to demonstrate similar amplitude signals to the hotspot electrode in the hemisphere where TMS was applied, but will be minimally affected by the application of TMS on the opposite side of the head.

EEG signals from the electrode closest to the TMS ‘hotspot’ were compared to signals from the corresponding electrode in the opposite hemisphere. A power spectrum was computed and decomposed into the following frequency bands: delta (1-4 Hz), theta (5-7 Hz), alpha (8-14 Hz), beta (15-30 Hz) and gamma (31-80 Hz). Log transformed average power values within each band were entered into a repeated measures ANOVA model, with a 2x2 full factorial design. The factors were ‘electrode’ (two levels: hotspot or control), and ‘presence of spacer’ (two levels: ‘spacer’ or ‘no spacer’). ANOVA models were conducted for each of the five frequency bands, and separately for raw and cleaned data. Partial eta squared ( $\eta^2$ )

effect sizes are reported for main effects, where greater than 0.14 is considered a large effect.

## RESULTS

With the addition of the spacer, resting motor thresholds increased on average by  $11 \pm 1\%$  of the maximum stimulator output (MSO), compared to using no spacer (without spacer mean  $47 \pm 9$  MSO, with spacer mean  $58 \pm 8$  MSO).

Upon inspection of the data it is clear (Figure 1C & 2A) that the amplitude of signals collected without the spacer in the delta frequency range are an order of magnitude greater compared to those collected with the inclusion of the spacer, or compared to the control electrode in the opposite hemisphere. The movement artifacts manifest in the power spectrum predominantly in the lowest frequency ranges. At the lowest extracted frequency (1 Hz) power values were on average 8.3 times greater when no spacer was used compared to when the spacer was in place preventing the coil from contacting the cap. In the delta range these signals were 6.5 times larger on average, theta 1.5 times, alpha 1.5 times, beta 1.1 times and gamma 1.2 times larger.

For EEG signals in the delta frequency range, there was a significant ‘electrode’ by ‘spacer/no spacer’ interaction (Figure 2B), indicating that the amplitude of 1-4Hz oscillations were significantly higher when the TMS coil was in contact with the EEG cap compared to when the spacer was used, and this difference was only present at the hotspot electrode and not at the control electrode. Importantly, this interaction was present both in the raw data ( $F[1,5]=28.12, p=0.003, \eta^2 = 0.84$ ) and in the data cleaned using accepted standard artifact rejection procedures ( $F[1,5]=8.62, p=0.03, \eta^2 = 0.63$ ). The same interaction was present in the EEG signals in the theta band, in both the raw ( $F[1,5]=7.34, p=0.04, \eta^2 = 0.59$ ) and cleaned data ( $F[1,5]= 8.57, p=0.03, \eta^2 = 0.63$ ). While a similar pattern was observed in the alpha band signals, there were no significant interactions for alpha, beta or gamma (all  $p>0.18$ ).

## DISCUSSION

Here we demonstrate that artifacts arising in the pre-TMS EEG period from contact of the TMS coil on the surface of the cap are substantial, and exhibit frequency profiles that are well within the physiological range of viable brain signals. When the TMS coil was in direct contact with the EEG cap, the amplitude of EEG signals was elevated across all frequency bands, but evidently the lowest recorded frequencies were most susceptible, with those in the Delta and Theta range seriously affected. This can be seen from the very large effect sizes for the interactions between conditions with and without the spacer present and electrode position for these frequency bands. Importantly, standard data processing using ICA cleanup was insufficient to remove these artifacts, most likely because they closely resemble true electrophysiological data. The introduction of a plastic ‘coil spacer’ reduced this signal disturbance, and resulted in data more closely resembling that recorded from the corresponding (control) electrode in the opposite hemisphere.

Even without physical contact with the scalp, the fast changing magnetic field held near the hotspot can induce a flow of current in the underlying neural tissue. While many recent TMS-EEG investigations have proceeded with the TMS coil placed directly on the head (which is in fact the configuration advertised commercially in several brochures for TMS-compatible EEG systems), the majority of well controlled investigations have implemented holding apparatus for positioning the coil over the head, advocating a ‘no contact’ approach (Ilmoniemi and Kičić 2009; Veniero et al. 2009), whereby the coil hovers close to the scalp. While this is one possible solution to the movement artifact problem, it is difficult to maintain over long testing sessions as natural subject movement causes the gap between the coil and the head to be non uniform over time, and contact can often occur. The spacer can be used with or without an additional coil holding apparatus, and ensures that the distance between scalp and coil remains fixed.

### *Limitations of the study*

While the current version of the spacer has been adapted for use with the EGI cap system, small modifications may be required for use with other EEG systems. In



particular, caps that have fully closed surfaces (rather than the open net-like design of EGI) may encounter more difficulties, as it is unknown whether contact of the spacer legs on the cap surface would transfer some portion of the movement artifacts to the nearby electrodes. However, with any existing EEG system it is expected that using the spacer to raise the coil a small distance above the electrodes and eliminating direct contact would result in higher quality data. We provide a fully editable 3D printer design file to allow other groups to make changes where necessary to accommodate their specific cap layout.

Another limitation is that with the inclusion of the spacer, the TMS intensity required to evoke motor responses in the finger muscles was increased by 11% on average compared to when the coil was directly on top of the EEG cap. In some cases, the necessity to use higher intensities may prevent the participation of subjects with high RMTs. This is an unavoidable consequence of the extra distance between the scalp and the coil, and is a problem that is also present when using a coil holding apparatus with a similar distance air-gap between the coil and the head.

### *Conclusions*

We introduce the plastic ‘coil spacer’ for use in future simultaneous TMS-EEG recordings, to provide quality data from the hotspot region that is unaffected by movement artifact arising from contact between the coil and electrodes. We profile the extent of the low frequency movement artifacts that arise when no precautions are taken to avoid contact, and demonstrate the efficacy of a simple solution to the problem.

## FIGURE LEGENDS

**Figure 1. Combined TMS-EEG using the Spacer.** The spacer design (A) and an image of the spacer in use during an experiment (B). EEG recordings from a representative subject of one 4000 ms epoch in each condition (C): Blue arrows indicate the location of the electrode from which recordings are displayed. In the upper panel, the TMS coil is placed directly on top of the EEG cap over the left hemisphere motor hotspot during recording. The mid panel depicts the same epoch of data but recorded from the corresponding electrode on the right hemisphere while the TMS coil is on the left hemisphere. The lower Panel shows the left hemisphere hotspot recording when the spacer is placed between the TMS coil and the EEG cap.

**Figure 2. Power spectrum differences with and without spacer.**

Panel A depicts average power spectra over 20 epochs from one representative subject for the hotspot electrode over which the coil and spacer were placed, and a control electrode (corresponding position on the opposite hemisphere). Signals are shown both raw (top panels) and cleaned using ICA (bottom panels). Shaded regions indicate standard deviation. Large artifacts manifest as greatly increased power in the ‘no spacer’ spectra (cyan) in the low frequency range when the TMS coil is in contact with the cap. This is the case in both the raw and cleaned data. With the inclusion of the spacer, artifacts are minimized and signals are more similar to those recorded from the control electrode. Panel B shows group level results of 2x2 factorial design ANOVA models, separated into five frequency bands. Bars depict mean logged power values. Error bars show standard error of the mean. Lines with a \* indicate a significant ‘electrode’ x ‘spacer/no spacer’ interaction.

## REFERENCES

- Bonato C, Miniussi C, Rossini PM. Transcranial magnetic stimulation and cortical evoked potentials: A TMS/EEG co-registration study. *Clinical Neurophysiology*. 2006 Aug;117(8):1699–707.
- Delorme A, Makeig S. EEGLAB: an open source toolbox for analysis of single-trial EEG dynamics including independent component analysis. *Journal of Neuroscience Methods*. 2004 Mar 15;134(1):9–21.
- Ferreri F, Pasqualetti P, Määttä S, Ponzo D, Ferrarelli F, Tononi G, et al. Human brain connectivity during single and paired pulse transcranial magnetic stimulation. *Neuroimage*. 2011 Jan 1;54(1):90–102.
- Ilmoniemi RJ, Kičić D. Methodology for Combined TMS and EEG. *Brain Topogr*. 2009 Dec 10;22(4):233–48.
- Miniussi C, Thut G. Combining TMS and EEG offers new prospects in cognitive neuroscience. *Brain Topogr*. 2010 Jan;22(4):249–56.
- Paus T, Sipila PK, Strafella AP. Synchronization of Neuronal Activity in the Human Primary Motor Cortex by Transcranial Magnetic Stimulation: An EEG Study. *Journal of Neurophysiology*. American Physiological Society; 2001 Oct 1;86(4):1983–90.
- Thut G, Pascual-Leone A. A Review of Combined TMS-EEG Studies to Characterize Lasting Effects of Repetitive TMS and Assess Their Usefulness in Cognitive and Clinical Neuroscience - Springer. *Brain Topogr*. 2010.
- Veniero D, Bortoletto M, Miniussi C. TMS-EEG co-registration: On TMS-induced artifact. *Clinical Neurophysiology*. Elsevier; 2009 Jul 1;120(7):1392–9.

**A**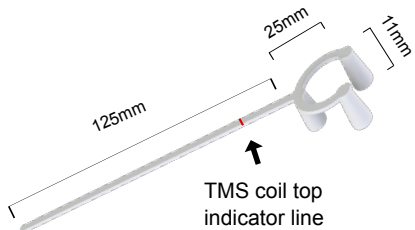**B**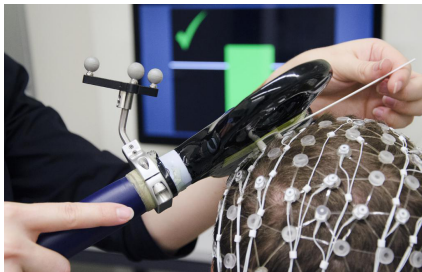**C**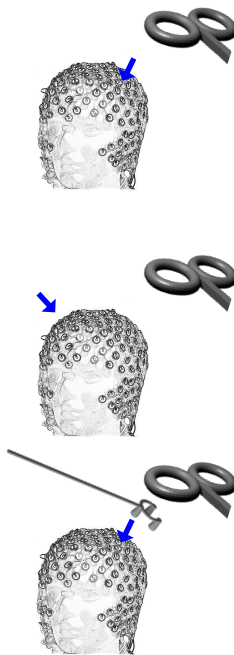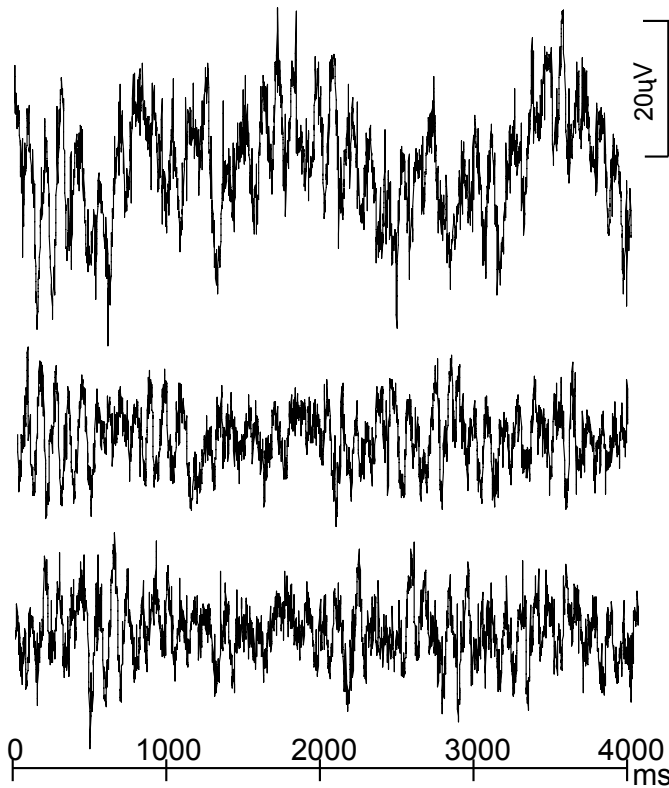

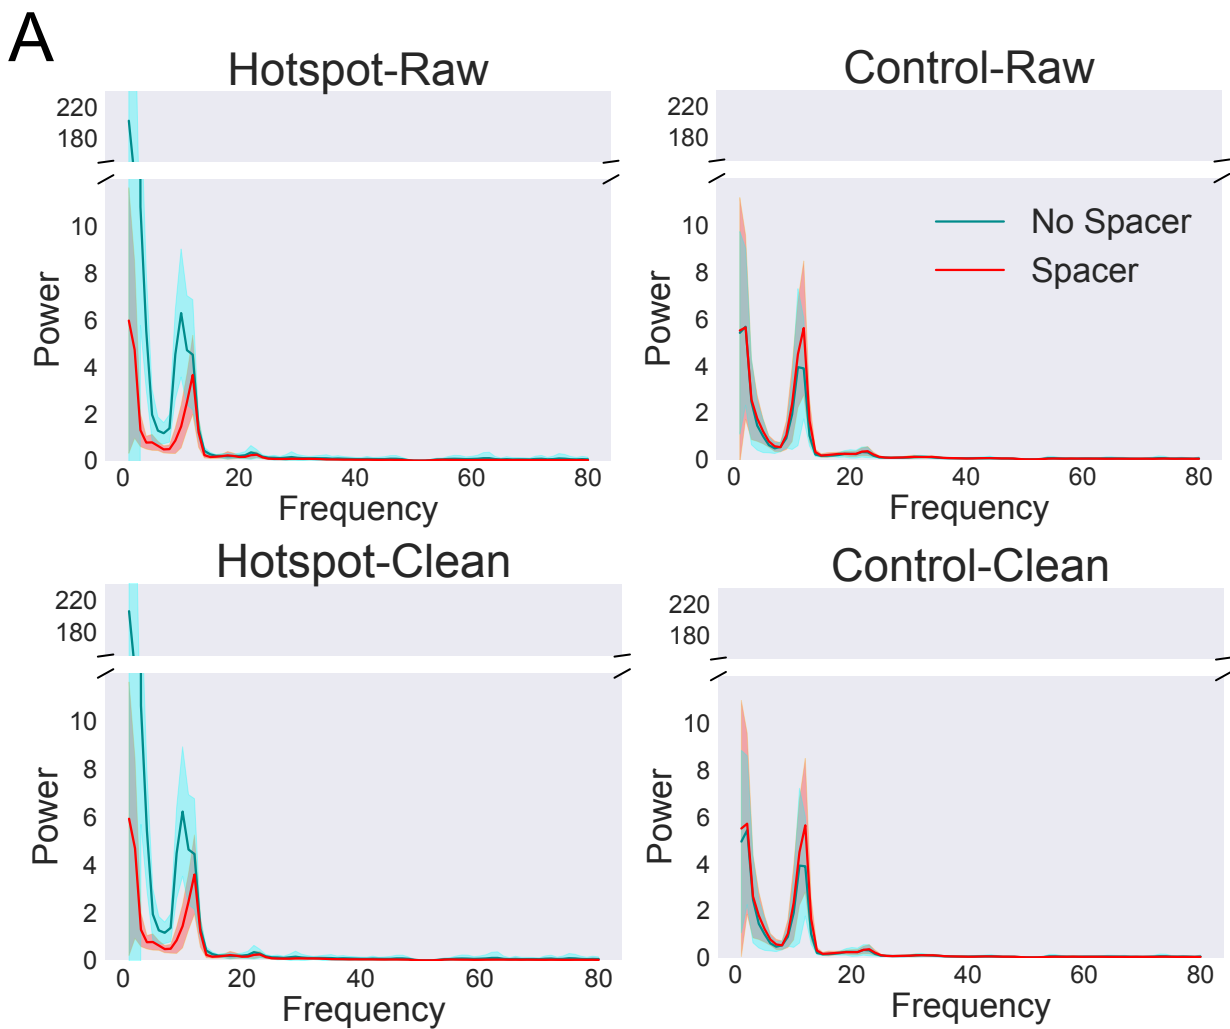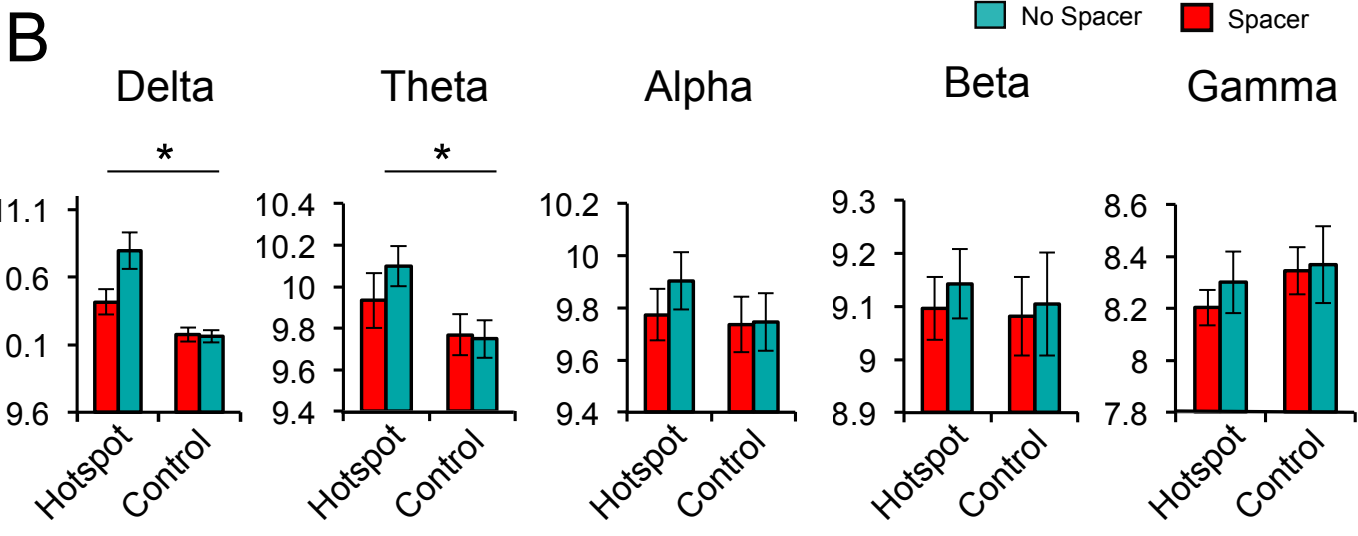

Source: http://www.biorxiv.org/content/10.1101/170431v1.full.pdf
